# Supplementary material for: Human antibody recognition of antigenic site IV on Pneumovirus fusion proteins
Source: PubMed Central journal article supplement (PMC5823459; doi:10.1371/journal.ppat.1006837), 2018-02-22
Supplement: ppat.1006837.s001.pdf [file ppat.1006837.s001.pdf]

**Table S1. Summary of binding characteristics for the mAbs studied.**

| mAb          | Cross-Reactive? | Binding Angle | R429A Neut | Cell-surface |      |      | prefusion |         | postfusion |      |      | peptide   |             |             |             |          |          |
|--------------|-----------------|---------------|------------|--------------|------|------|-----------|---------|------------|------|------|-----------|-------------|-------------|-------------|----------|----------|
|              |                 |               |            | R429         | G430 | I432 | R429      | G430    | R429       | G430 | I432 | 15-mer WT | 15-mer R429 | 15-mer G430 | 15-mer I432 | 30-mer A | 30-mer B |
| <b>2N6</b>   | No              | -6            | Yes        | Yes          | Yes  | Yes  | Yes       | Yes     | Yes        | Yes  | Yes  | No        | No          | No          | No          | Yes      | No       |
| <b>3M3</b>   | No              | 6             | No         | No           | Yes  | Yes  | No        | Yes     | No         | Yes  | Yes  | No        | No          | No          | No          | No       | No       |
| <b>6F18</b>  | No              | -6            | No         | No           | Yes  | Yes  | No        | Yes     | Yes        | Yes  | Yes  | No        | No          | No          | No          | No       | No       |
| <b>17E10</b> | Yes             | -56           | Yes        | Yes          | No   | No   | Yes       | partial | Yes        | Yes  | Yes  | Yes       | No          | No          | No          | Yes      | Yes      |
| <b>101F</b>  | Yes             | -32           | No         | n.d.         | n.d. | n.d. | No        | partial | Yes        | Yes  | Yes  | Yes       | No          | No          | No          | Yes      | Yes      |
| <b>54G10</b> | Yes             | n.d.          | No         | n.d.         | n.d. | n.d. | No        | No      | Yes        | No   | Yes  | No        | No          | No          | No          | No       | No       |

The summary of neutralization and binding data is provided for reference. A green color and “Yes” indicates the mAb does neutralize or bind to each protein indicated. A red color and “No” indicates no binding or neutralization. An orange color and “partial” indicates some loss of binding. The binding angle relative to antigenic site IV is indicated. No data is available for those boxes in grey with n.d. (not determined).
