# Supplementary material for: Human antibody recognition of antigenic site IV on Pneumovirus fusion proteins
Source: PubMed Central journal article supplement (PMC5823459; doi:10.1371/journal.ppat.1006837), 2018-02-22
Supplement: ppat.1006837.s002.pdf [file ppat.1006837.s002.pdf]

## Supporting Information.

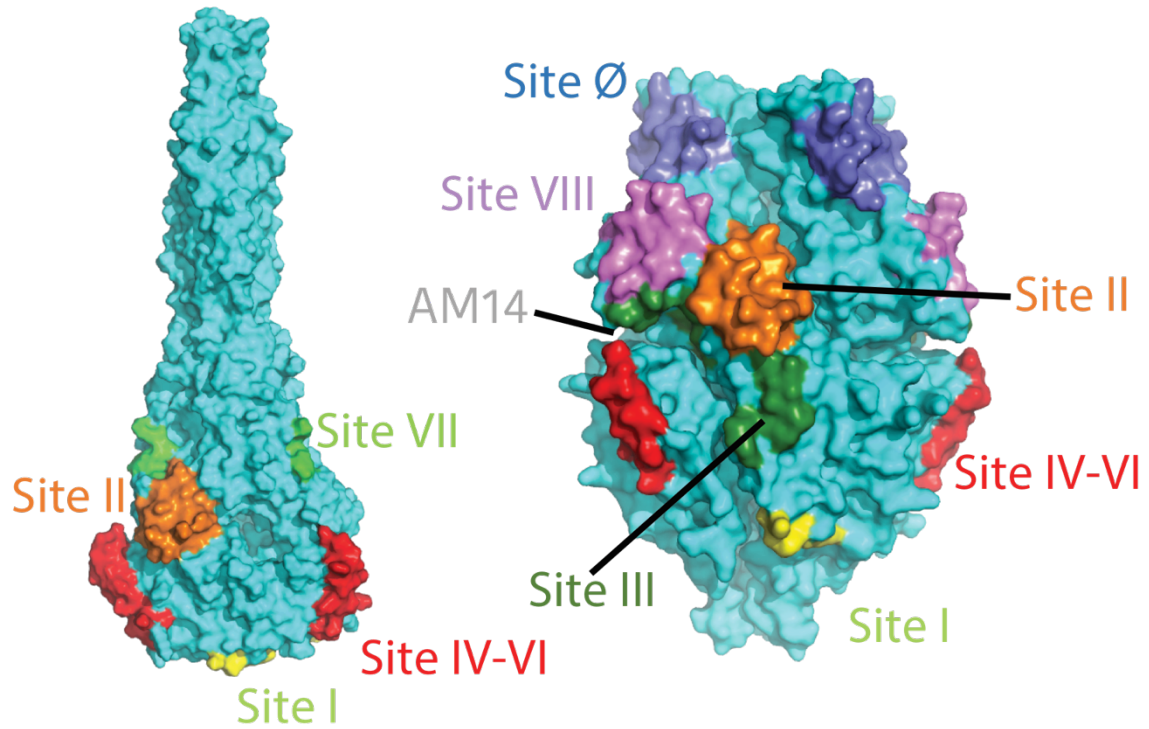

**Fig. S1. Summary of known antigenic sites on the RSV F protein.**
