# Supplementary material for: Human antibody recognition of antigenic site IV on Pneumovirus fusion proteins
Source: PubMed Central journal article supplement (PMC5823459; doi:10.1371/journal.ppat.1006837), 2018-02-22
Supplement: ppat.1006837.s003.pdf [file ppat.1006837.s003.pdf]

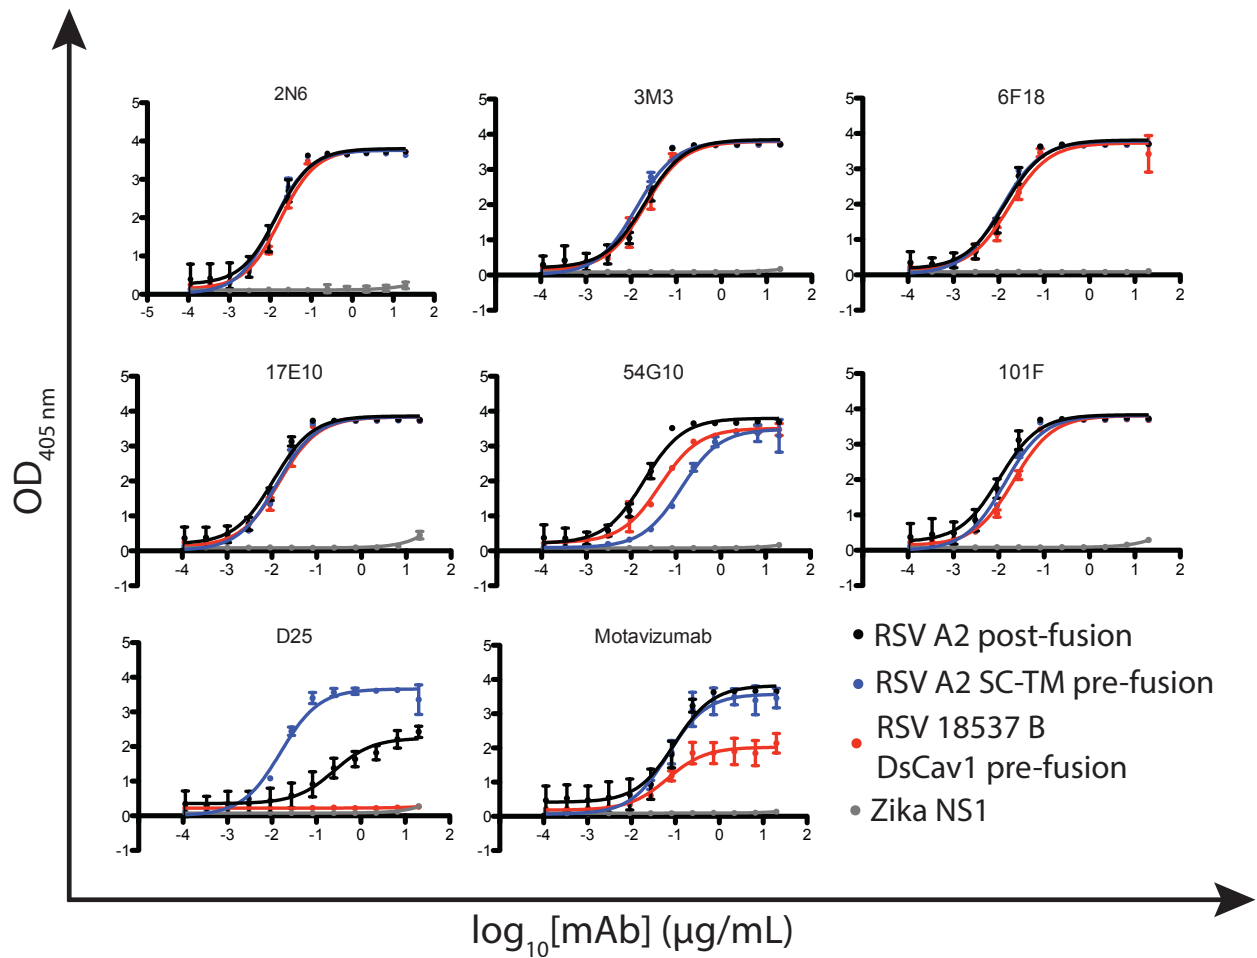

**Fig. S2. ELISA binding curves for the newly generated site IV mAbs and controls to RSV F protein and construct variants.**  $EC_{50}$  values for these curves are displayed in Table 1. Zika NS1 protein was used as a negative control. Each data point is the average of three independent experiments, each with four technical replicates. Error bars represent the standard deviation.
