# Supplementary material for: Human antibody recognition of antigenic site IV on Pneumovirus fusion proteins
Source: PubMed Central journal article supplement (PMC5823459; doi:10.1371/journal.ppat.1006837), 2018-02-22
Supplement: ppat.1006837.s004.pdf [file ppat.1006837.s004.pdf]

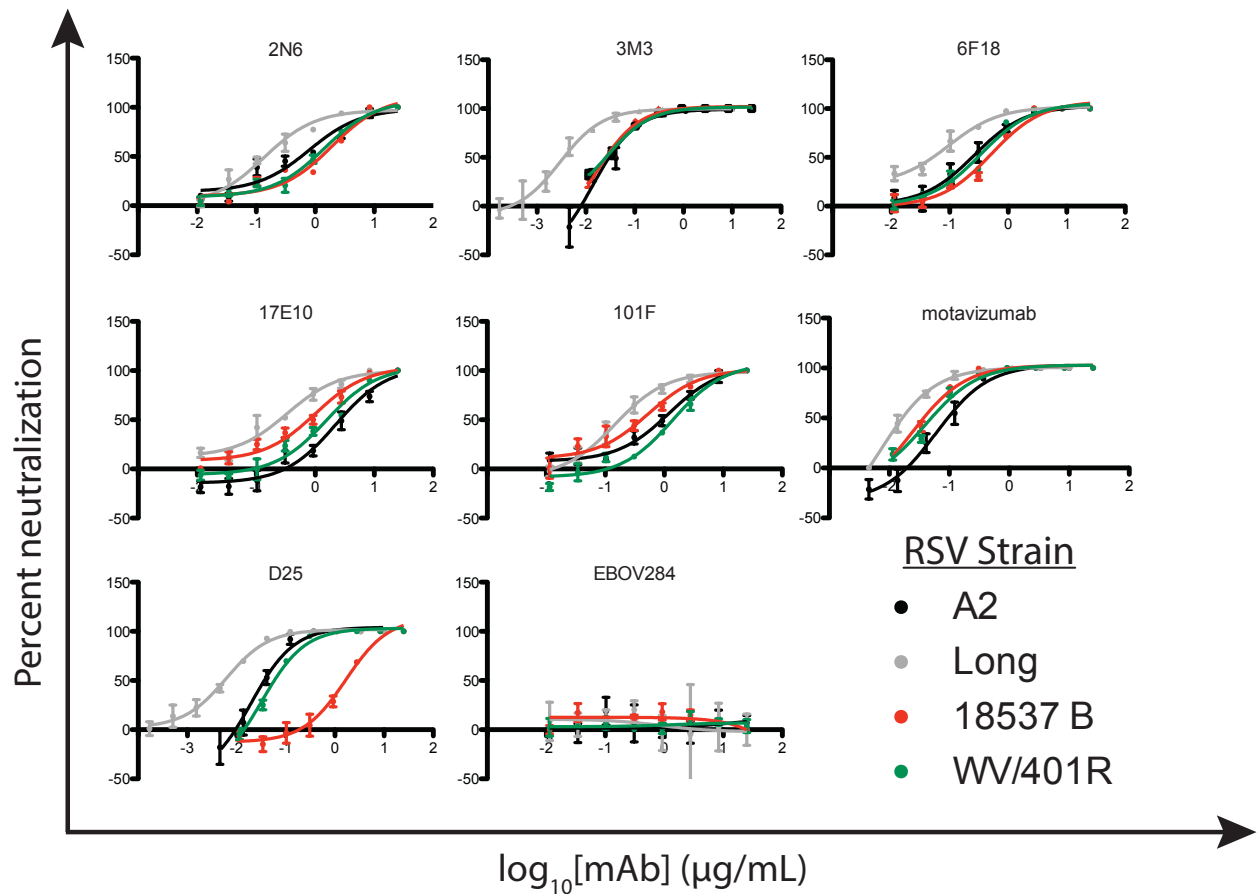

**Fig S3. Neutralization curves for the newly generated site IV mAbs and controls.**  $IC_{50}$  values are displayed in Table 1. An Ebola virus-specific mAb EBOV284 was included as a negative control. Data points indicate the average of three technical replicates. Error bars represent the standard deviation.
