# Supplementary material for: Human antibody recognition of antigenic site IV on Pneumovirus fusion proteins
Source: PubMed Central journal article supplement (PMC5823459; doi:10.1371/journal.ppat.1006837), 2018-02-22
Supplement: ppat.1006837.s006.pdf [file ppat.1006837.s006.pdf]

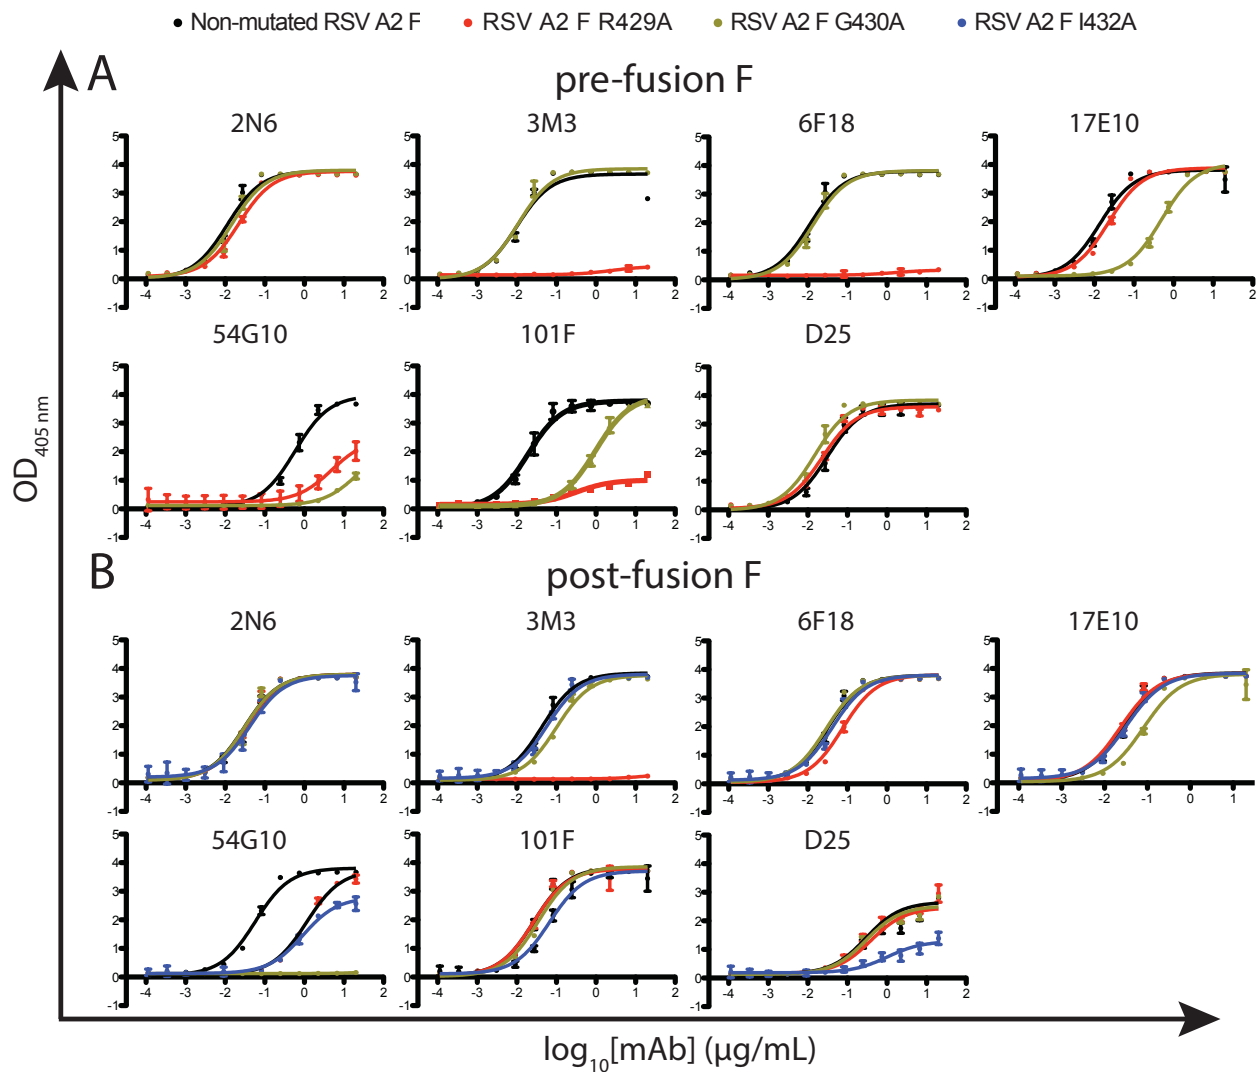

**Fig. S5. ELISA binding curves for the site IV mAbs and controls to (A) pre-fusion (SC-TM) or (B) post-fusion RSV A2 mutant proteins.** Each data point is the average of three independent experiments, each with four technical replicates. Error bars indicate the standard deviation. EC<sub>50</sub> values are shown in Figure 2C.
