# Supplementary material for: Human antibody recognition of antigenic site IV on Pneumovirus fusion proteins
Source: PubMed Central journal article supplement (PMC5823459; doi:10.1371/journal.ppat.1006837), 2018-02-22
Supplement: ppat.1006837.s007.pdf [file ppat.1006837.s007.pdf]

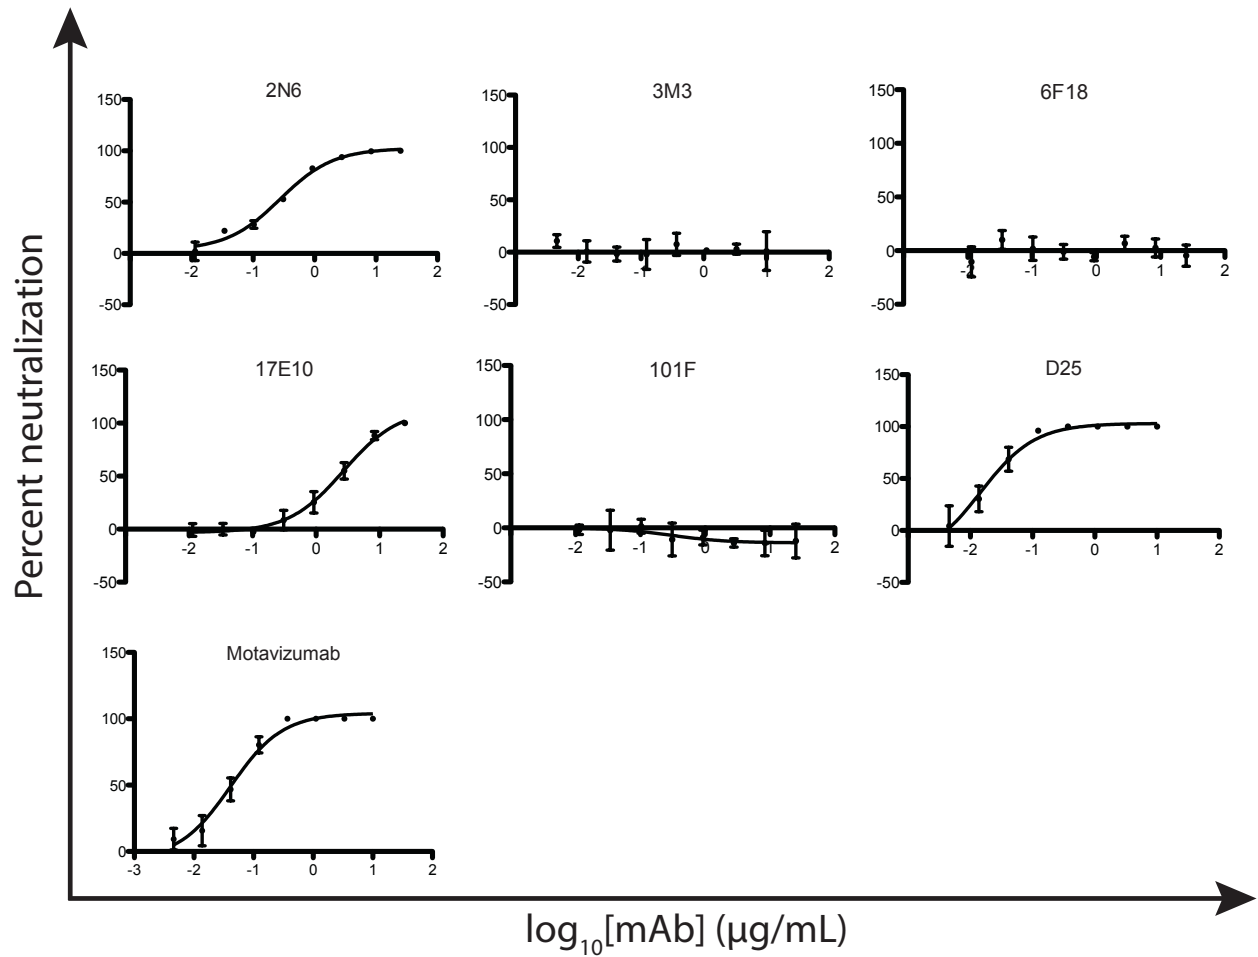

**Fig. S6. Plaque-reduction assay curves for the newly generated site IV mAbs and controls for neutralization of the RSV A2 R429A mutant virus. IC<sub>50</sub> values are displayed in Fig. 2C. Data points indicate the average of three technical replicates. Error bars represent the standard deviation.**
