# Supplementary material for: Human antibody recognition of antigenic site IV on Pneumovirus fusion proteins
Source: PubMed Central journal article supplement (PMC5823459; doi:10.1371/journal.ppat.1006837), 2018-02-22
Supplement: ppat.1006837.s008.pdf [file ppat.1006837.s008.pdf]

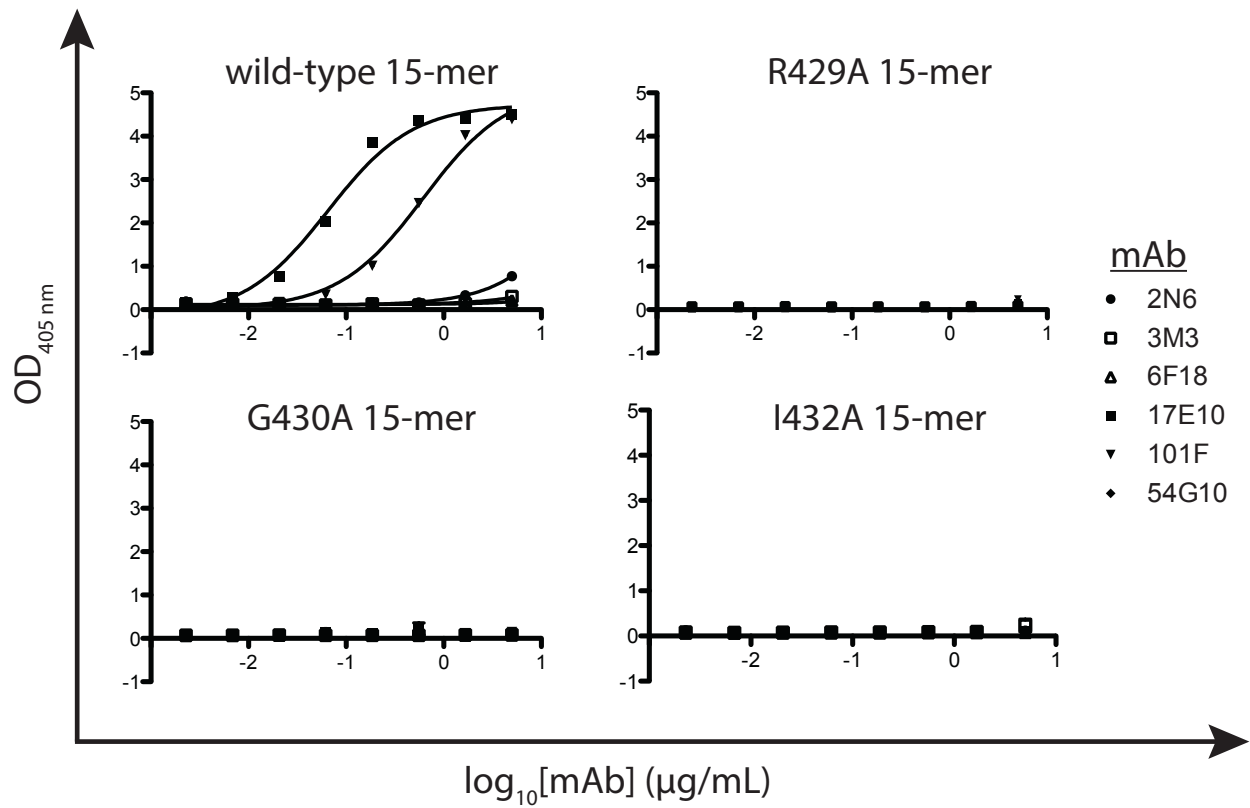

**Fig. S7. ELISA binding curves of site IV mAbs to biotinylated site IV 15-mer peptides coated on streptavidin ELISA plates.** Data points are the average of two technical replicates. Error bars indicate the range of the two measurements.
